# Supplementary material for: Prevalence of S-methyl-5′-thioadenosine Phosphorylase (MTAP) Deficiency in Human Cancer: A Tissue Microarray Study on 13,067 Tumors From 149 Different Tumor Types
Source: PubMed Central journal article supplement — Am J Surg Pathol. 2024 Aug 12;48(10):1245–58. doi: 10.1097/PAS.0000000000002297 (PMC11404761; doi:10.1097/pas.0000000000002297), 2024-08-12
Supplement: pas-48-1245-s001.pdf [file pas-48-1245-s001.pdf]

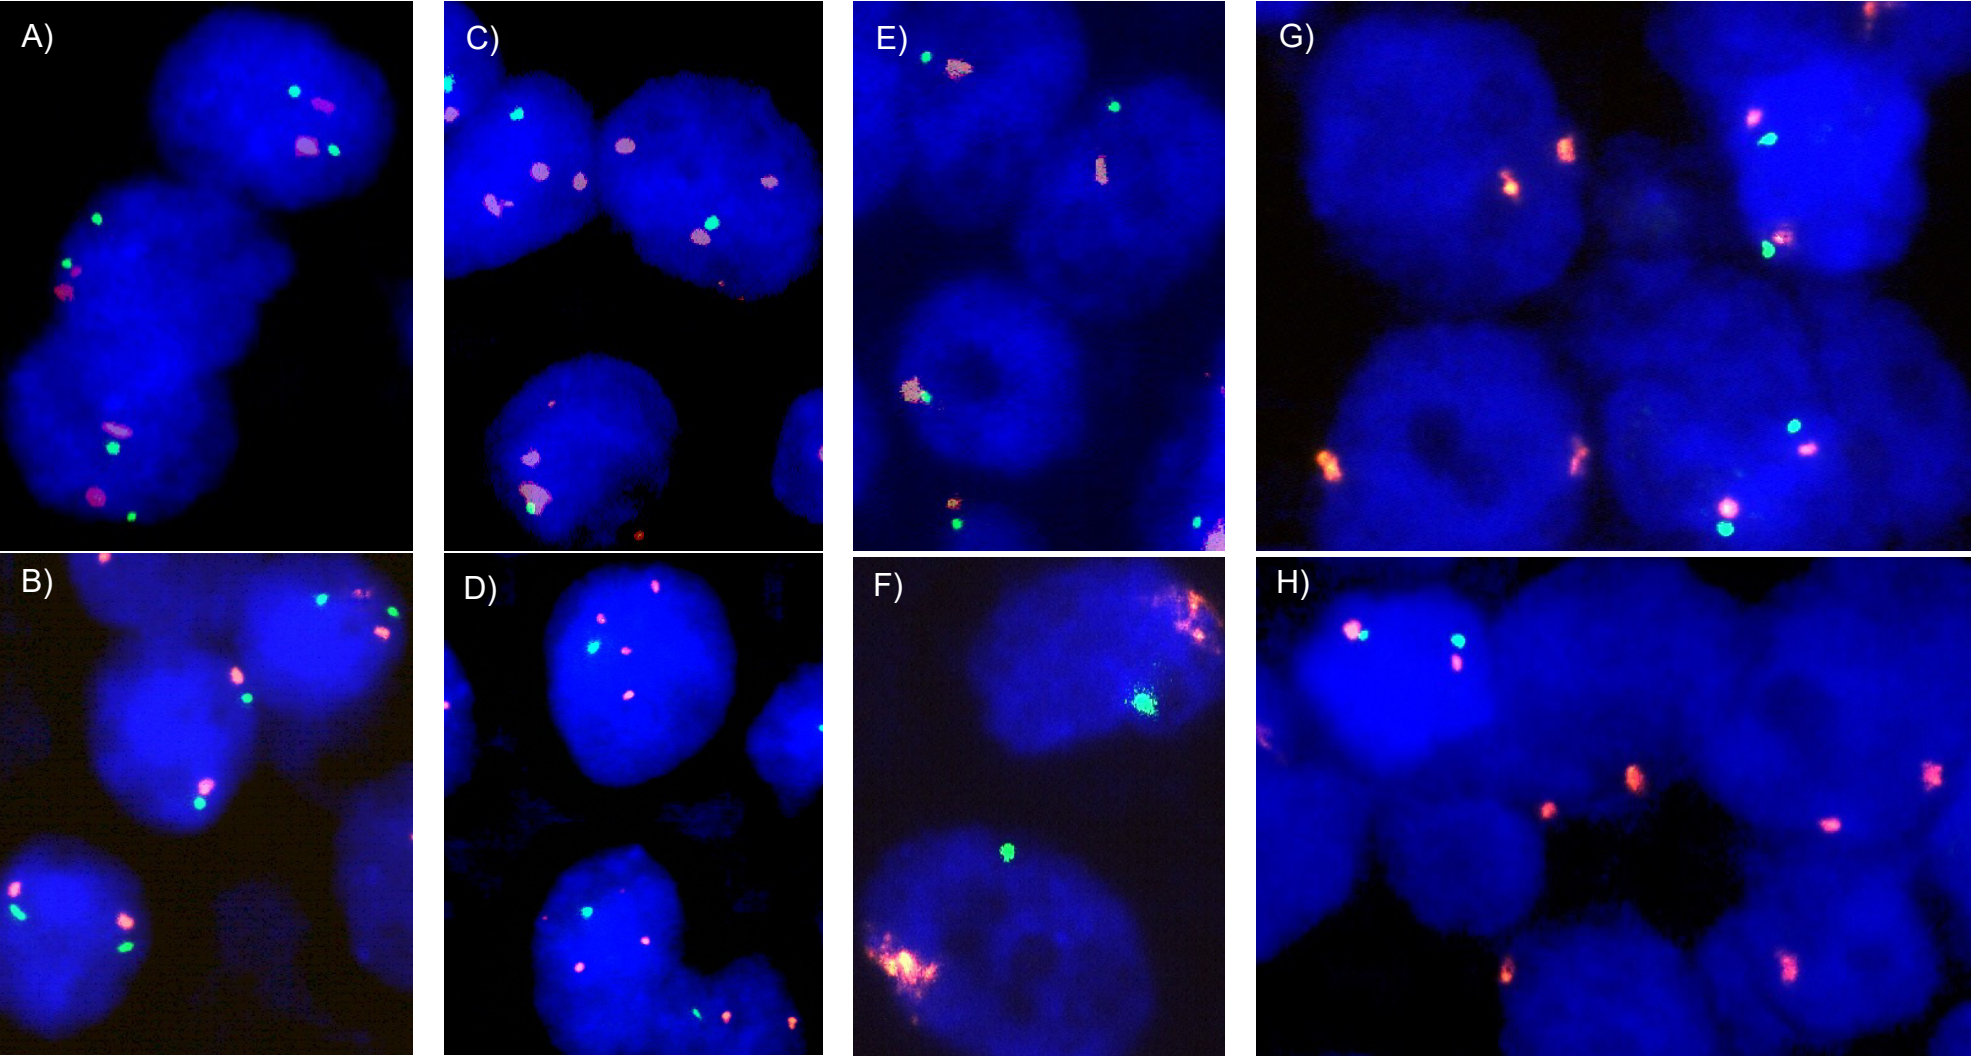

Supplementary figure 1. Examples of 9p21 FISH findings. A-B) normal 9p21 copy number status with two green 9p21 and two orange centromere 9 signals, C-D) heterozygous 9p21 deletion with one green 9p21 and two orange centromere 9 signals, E-F) monosomy of chromosome 9 with one green 9p21 and one centromere 9 signal, and G-H) homozygous 9p21 deletion without any green 9p21 signal and presence of orange centromere 9 signals in tumor cell nuclei as well as green 9p21 signal and orange centromere 9 signals in adjacent normal cell nuclei.
