# Supplementary material for: Prevalence of S-methyl-5′-thioadenosine Phosphorylase (MTAP) Deficiency in Human Cancer: A Tissue Microarray Study on 13,067 Tumors From 149 Different Tumor Types
Source: PubMed Central journal article supplement — Am J Surg Pathol. 2024 Aug 12;48(10):1245–58. doi: 10.1097/PAS.0000000000002297 (PMC11404761; doi:10.1097/pas.0000000000002297), 2024-08-12
Supplement: pas-48-1245-s002.pdf [file pas-48-1245-s002.pdf]

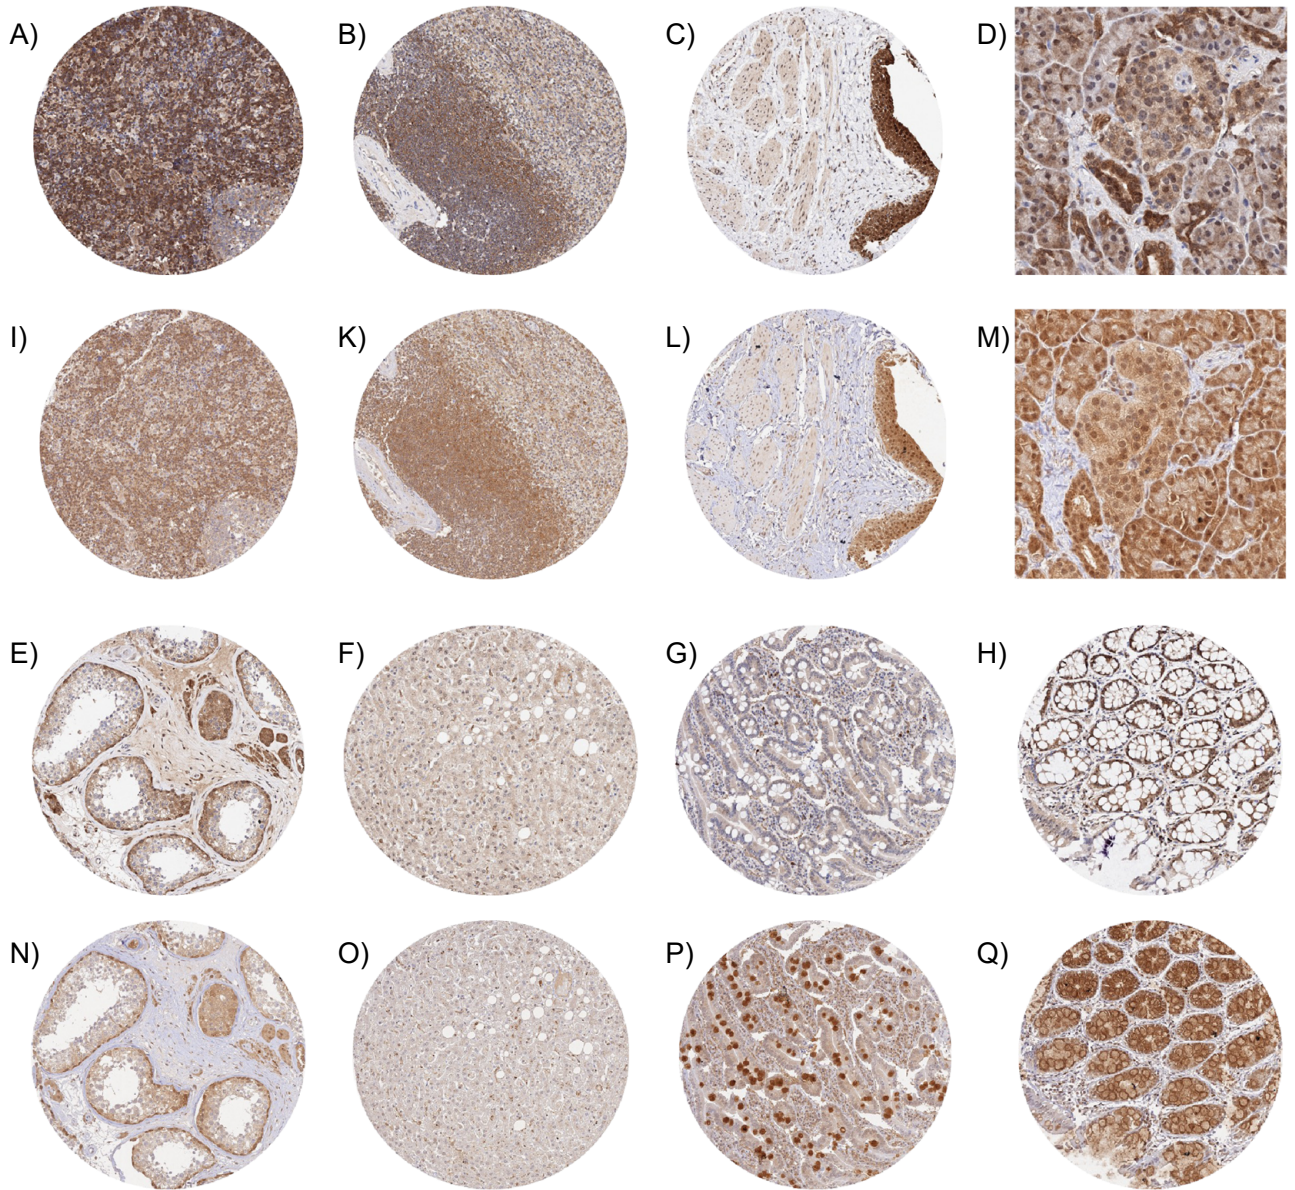

Supplementary figure 2. Immunohistochemistry validation by comparison of two antibodies. The panels show a high concordance of immunostaining results obtained by the independent MTAP antibodies MSVA-741R and 2G4. Using MSVA-741R, particularly significant MTAP staining was seen in interfollicular lymphocytes of a lymph node (A), lymphocytes of the spleen (B), urothelial cells of the bladder (C), acinar, excretory duct, and islet cells of the pancreas (D), and spermatogonia and Leydig cells of the testis (E) while the staining intensity was lower in hepatocytes (F), duodenal (G) and colorectal epithelial cells (H). Using clone 2G4, a highly similar MTAP staining pattern was observed in lymph node (I), spleen (K), bladder mucosa (L), pancreas (M), testis (N), and the liver (O) although clone 2G4 resulted an additional mucus staining in goblet cells of the duodenum (P) and the colorectum (Q). The images A-H and I-Q are from consecutive tissue sections.
