# Supplementary material for: Prevalence of S-methyl-5′-thioadenosine Phosphorylase (MTAP) Deficiency in Human Cancer: A Tissue Microarray Study on 13,067 Tumors From 149 Different Tumor Types
Source: PubMed Central journal article supplement — Am J Surg Pathol. 2024 Aug 12;48(10):1245–58. doi: 10.1097/PAS.0000000000002297 (PMC11404761; doi:10.1097/pas.0000000000002297), 2024-08-12
Supplement: pas-48-1245-s004.pdf [file pas-48-1245-s004.pdf]

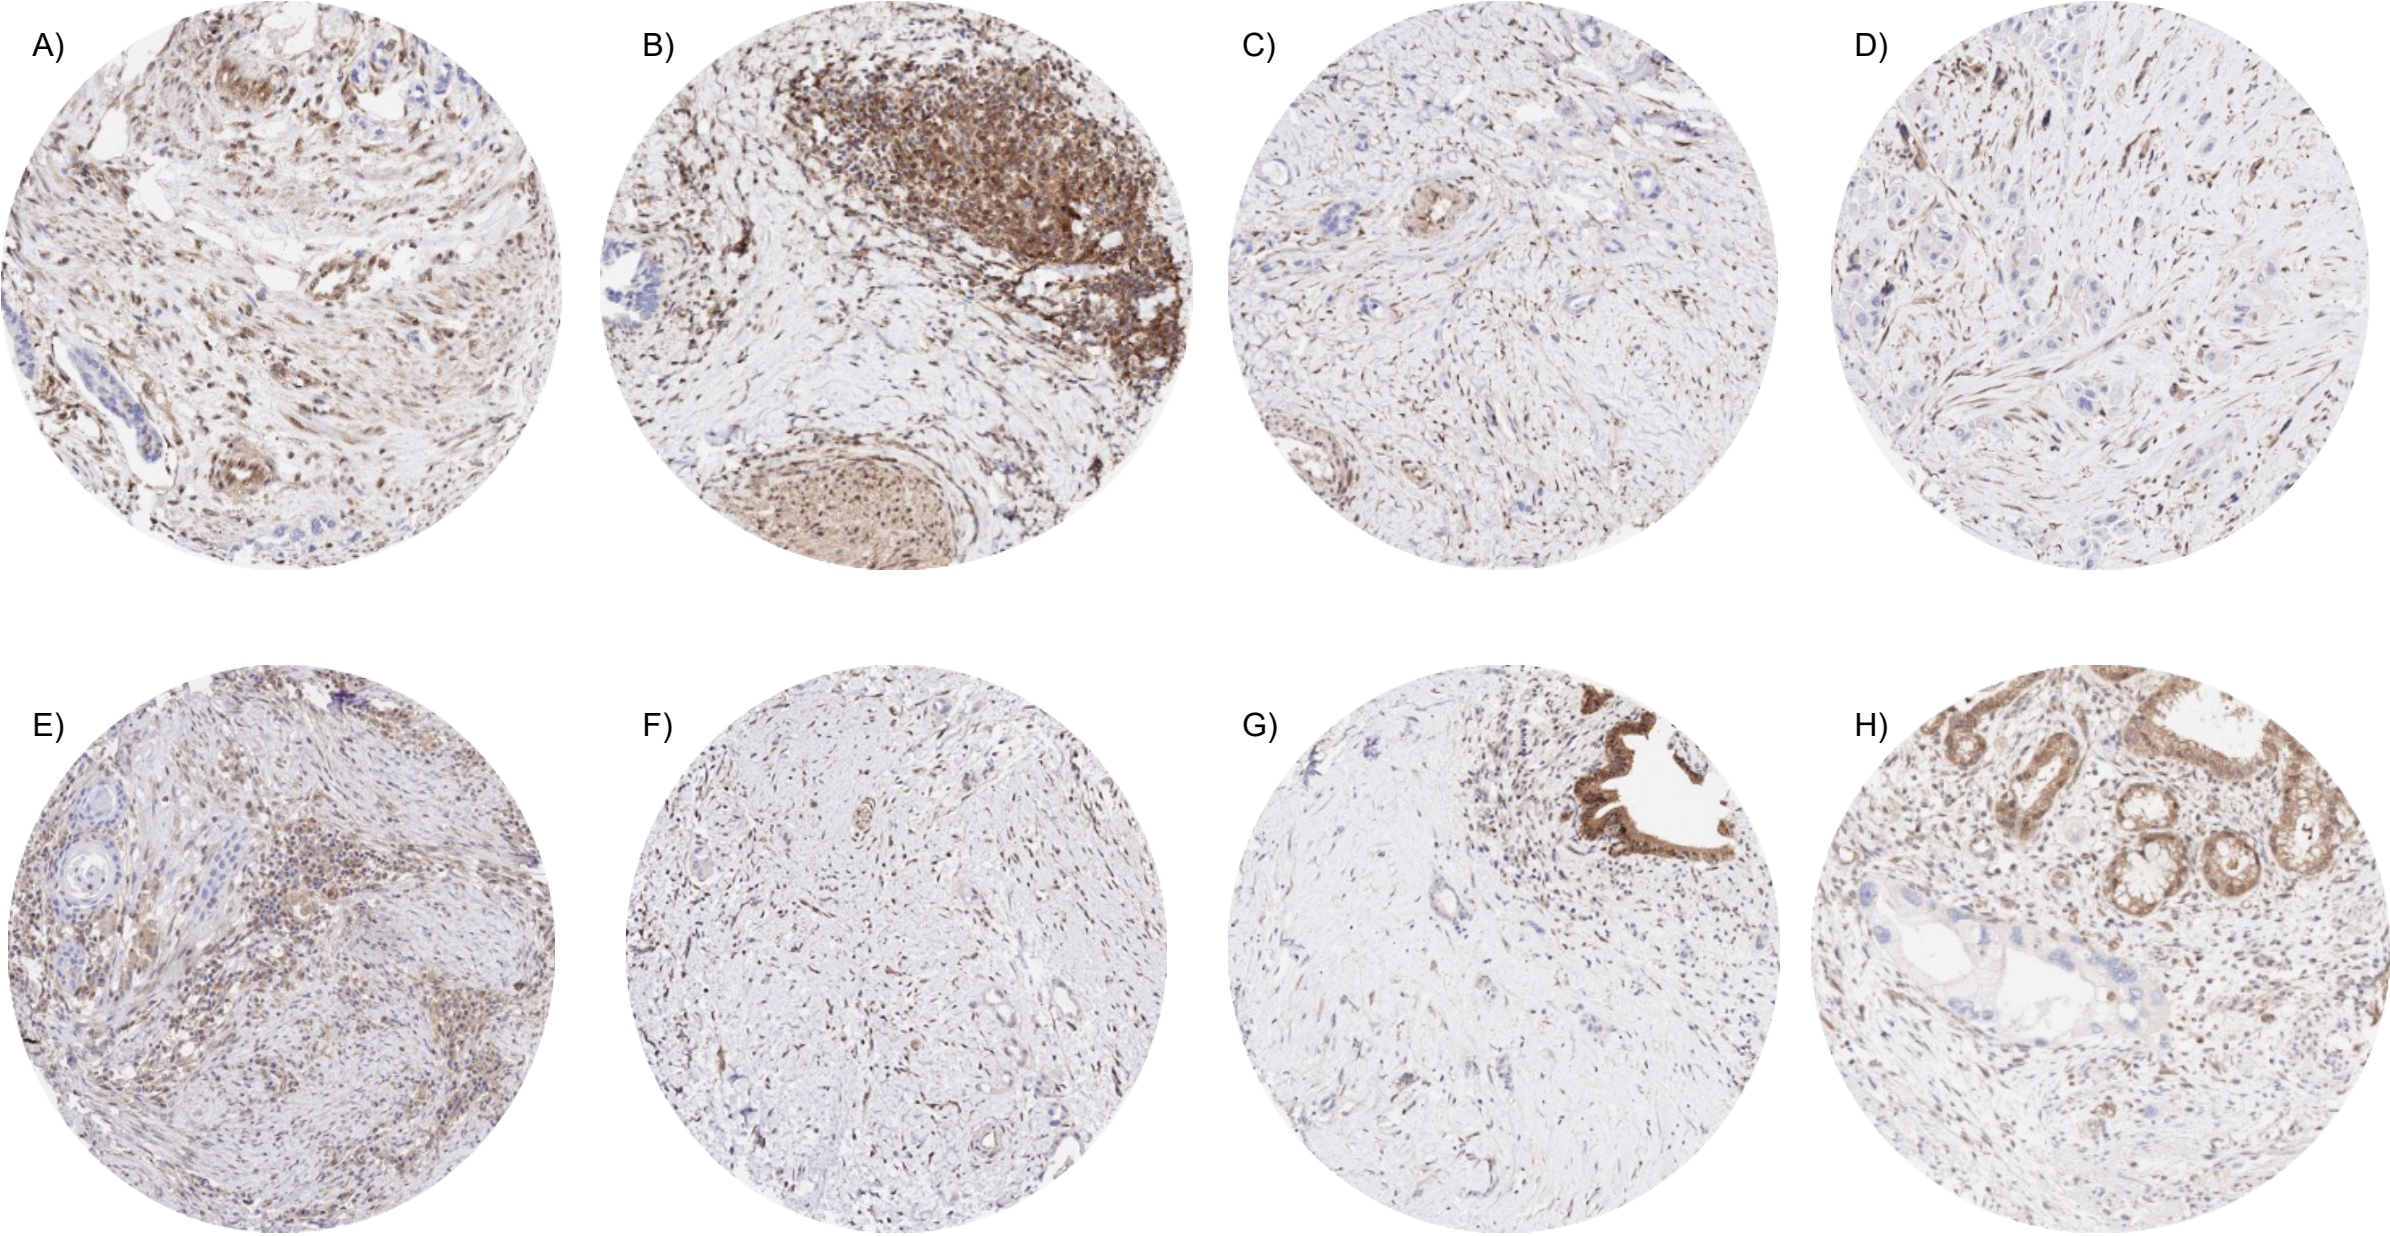

Supplementary figure 3. MTAP loss in very small tumor foci. The Panels show a complete loss of MTAP staining in very small groups of tumor cells of a gastric adenocarcinoma (A), a hepatocellular carcinoma (B), a gallbladder adenocarcinoma (C), a squamous cell carcinoma of the larynx (D), a squamous cell carcinoma of the oral cavity (E), and of three cases of ductal adenocarcinomas of the pancreas (F, G, H). Distinct MTAP positivity of intermingled stroma cells and of non-neoplastic epithelial cells serves as a positive internal control.
